# Supplementary material for: Regulation of TGF-β Superfamily Signaling by SMAD Mono-Ubiquitination
Source: MDPI journal article supplement (doi:10.3390/cells3040981), 2014-10-15
Supplement: s1 [file s1]

## Sheet: Sheet1
Table S1. The reported monoubiquitination sites in SMADs, their function and the related E3 ubiquitin ligases as well as DUBs.
SMADs	monoubiquitination sites	E3	DUB	function				Reference
SMAD3	K333,K341,K378,K409;K33,K53,K81	SMURF2	USP15	inhibits SMAD3-SMAD4 complexes formation leading to a lower SMAD3 transcriptional activity				35, 36
SMAD4	K519	Ecto/Tif1γ/TRIM33	FAM/Usp9x	disrupts SMAD2-SMAD4 complex formation on the chromatin and inhibits TGF-β signaling				39
SMAD6	K174	UBE20	unknown	displays a lower binding afﬁnity for the activated BMP7 type I receptor and elevates BMP/SMAD signaling				40
